# Supplementary figures and images for: Long Interspersed Nuclear Element-1 Analytes in Extracellular Vesicles as Tools for Molecular Diagnostics of Non-Small Cell Lung Cancer
Source: MDPI journal article supplement (doi:10.3390/ijms25021169), 2024-01-18

Figure S1.

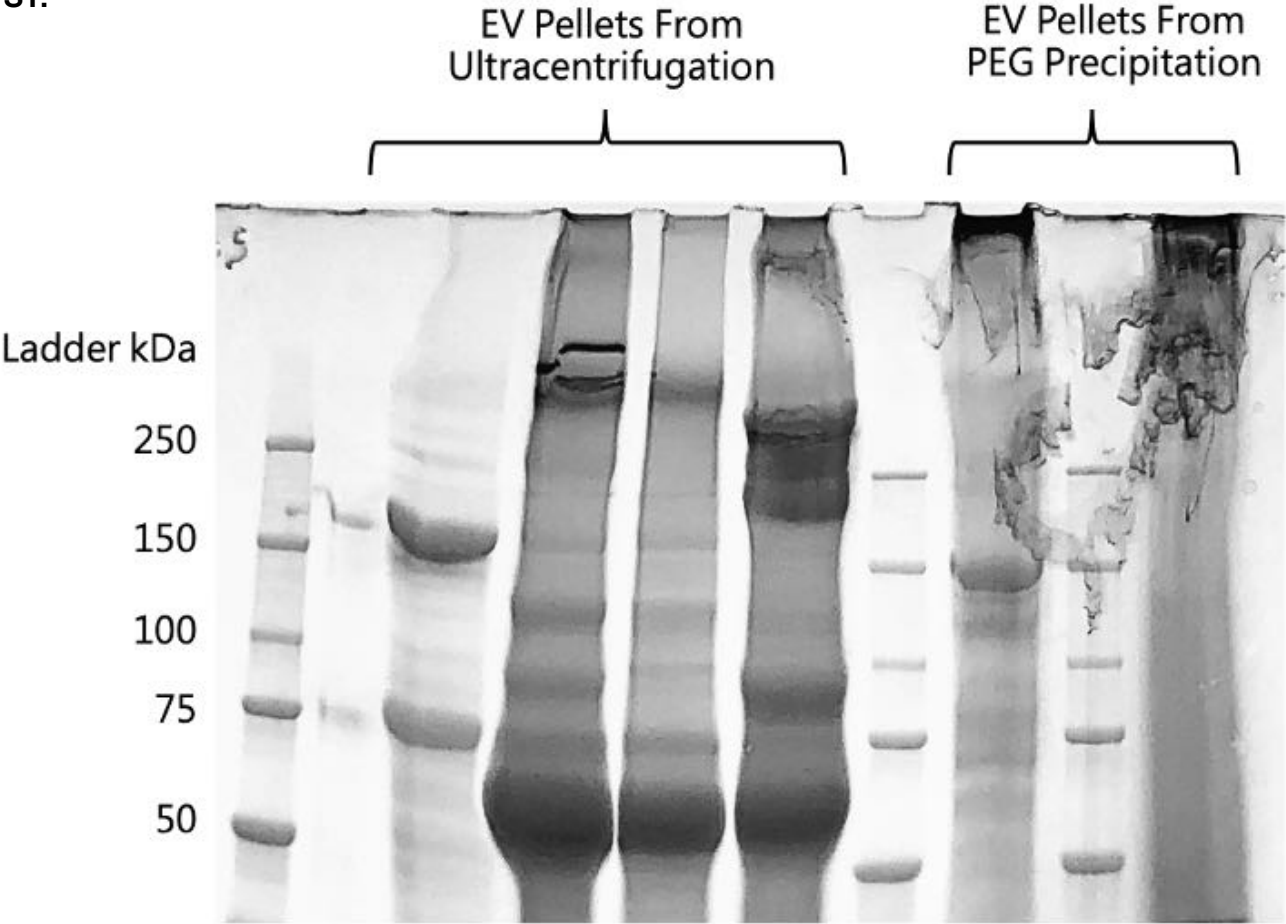

Figure S2.

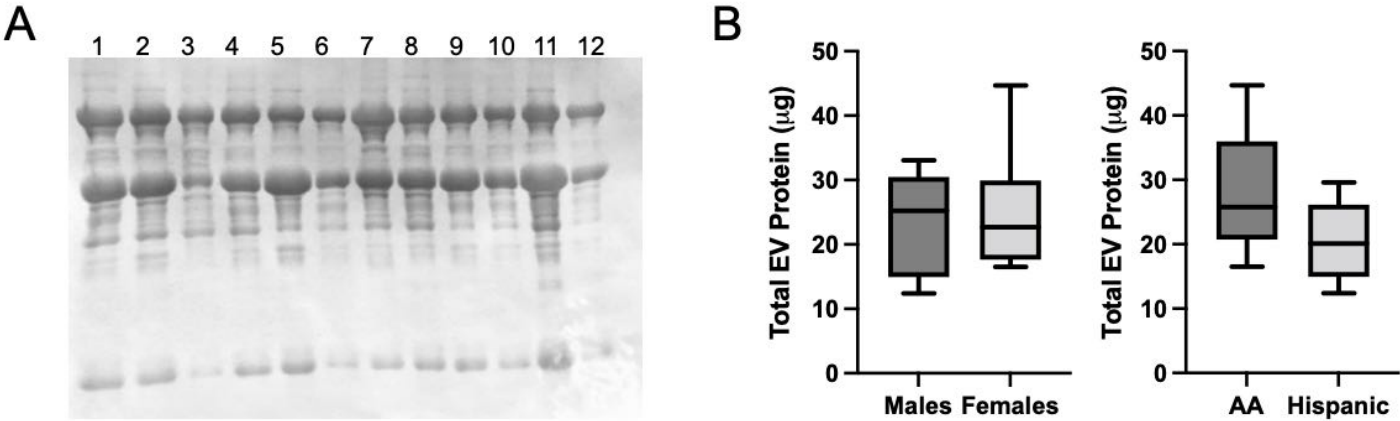

Supplement: s1 [file s1]
